# Supplementary material for: The Long-term Effects of Early Paternal Presence on Children’s Behavior
Source: Springer Nature journal article supplement (doi:10.1007/s10826-018-1206-1), 2018-08-20
Supplement: MOESM1 [file 16059882]

| Table S1 |  |  | | |  |  | |  |
| --- | --- | --- | --- | --- | --- | --- | --- | --- |
|  |  |  | | |  |  | |  |
| *Separate simple linear and binomial logistic regressions of continuous and categorical parent-report total difficulties (PRTD) scores at age 11* | | | | | | | | |
|  |  | PRTD (continuous) | | |  | PRTD (normal vs borderline / abnormal) | | |
| Variables |  | *b (SE)* | Β | *t* | *p* | B (SE) | Exp(B) | *p* |
| Child’s Birthweight |  |  |  |  |  |  |  |  |
|  | AGA | Ref |  |  |  | Ref |  |  |
|  | SGA | 1.08 (.42) | 0.10 | 2.59 | **.010** | .65 (.35) | 1.92 | **.064** |
|  |  |  |  |  |  |  |  |  |
| Child’s Sex |  |  |  |  |  |  |  |  |
|  | Female | Ref |  |  |  | Ref |  |  |
|  | Male | 1.65 (.41) | 0.16 | 4.04 | **<.001** | .68 (.37) | 1.96 | **.065** |
| Perceived Stress (p1) |  | 0.11 (.03) | 0.14 | 3.65 | **<.001** | .05 (.02) | 1.05 | **.036** |
| Family Income (p1) |  |  |  |  |  |  |  |  |
|  | <35,000 | 2.71 (.49) | 0.22 | 5.42 | **<.001** |  |  |  |
|  | >35,000 | Ref |  |  |  | .97 (.36) | 2.63 | **.007** |
| SES |  |  |  |  |  |  |  |  |
|  | High / Middle | Ref |  |  |  | Ref |  |  |
|  | Low | 1.15 (.93) | 0.05 | 1.23 | .218 | .10 (.75) | 1.11 | .890 |
| Maternal Schooling |  |  |  |  |  |  |  |  |
|  | Left before 16 | 2.30 (.74) | 0.13 | 3.10 | **.002** | Ref |  |  |
|  | Left after 16 | Ref |  |  |  | .01 (.62) | 1.01 | .992 |
| Paternal Schooling |  |  |  |  |  |  |  |  |
|  | Left before 16 | 1.48 (.62) | 0.10 | 2.39 | **.017** | Ref |  |  |
|  | Left after 16 | Ref |  |  |  | .19 (.50) | 1.21 | .708 |
| Informal Support (p1) |  | .03 (.03) | 0.06 | 1.38 | .169 | -.02 (.02) | 0.98 | .334 |
| Mother’s Age (preg) |  | -0.18 (.04) | -0.18 | -4.49 | **<.001** | -.06 (.03) | 0.94 | **.059** |
|  |  |  |  |  |  |  |  |  |
| Paternal Presence (p1) |  |  |  |  |  |  |  |  |
|  | Yes | Ref |  |  |  | Ref |  |  |
|  | No | 2.30 (.84) | 0.11 | 2.74 | **.006** | 1.19 (.48) | 3.28 | **.014** |
| Paternal Presence (p2) |  |  |  |  |  |  |  |  |
|  | Yes | Ref |  |  |  | Ref |  |  |
|  | No | 1.93 (.79) | 0.10 | 2.43 | **.015** | .93 (.52) | 2.54 | **.071** |
| Paternal Presence (p3) |  |  |  |  |  |  |  |  |
|  | Yes | Ref |  |  |  | Ref |  |  |
|  | No | 1.82 (.71) | 0.12 | 2.55 | **.011** | 1.03 (.44) | 2.80 | **.018** |
| Paternal Presence (p4) |  |  |  |  |  |  |  |  |
|  | Yes | Ref |  |  |  | Ref |  |  |
|  | No | 1.55 (.56) | 0.12 | 2.79 | **.005** | 1.10 (.38) | 3.01 | **.003** |
| Paternal Presence (p5) |  |  |  |  |  |  |  |  |
|  | Yes | Ref |  |  |  | Ref |  |  |
|  | No | 1.61 (.38) | 0.14 | 3.35 | **.001** | 1.19 (.36) | 3.30 | **.001** |
| *Note.* P values for control variables meeting threshold of inclusion (p<.10) are bolded | | | | | | | | |

| Table S2 |  |  | | |  |  | |  |
| --- | --- | --- | --- | --- | --- | --- | --- | --- |
|  |  |  | | |  |  | |  |
| *Separate simple linear and binomial logistic regressions of continuous and categorical child-report total difficulties (CRTD) scores at age 11* | | | | | | | | |
|  |  | CRTD (continuous) | | |  | CRTD (normal vs abnormal / borderline) | | |
| Variables |  | *b (SE)* | Β | *t* | *p* | B (SE) | Exp(B) | *p* |
| Child’s Birthweight |  |  |  |  |  |  |  |  |
|  | AGA | Ref |  |  |  | Ref |  |  |
|  | SGA | 1.27 (.41) | 0.13 | 3.11 | **.002** | .35 (.40) | 1.41 | .388 |
|  |  |  |  |  |  |  |  |  |
| Child’s Sex |  |  |  |  |  |  |  |  |
|  | Female | Ref |  |  |  | Ref |  |  |
|  | Male | 0.83 (.40) | 0.08 | 2.05 | **.041** | -.19 (.40) | .83 | .640 |
| Perceived Stress (p1) |  | 0.11 (.03) | 0.14 | 3.60 | **<.001** | .04 (.03) | 1.05 | .122 |
| Family Income (p1) |  |  |  |  |  |  |  |  |
|  | <35,000 | 2.76 (.48) | 0.23 | 5.71 | **<.001** | 1.29 (.41) | 3.63 | **.002** |
|  | >35,000 | Ref |  |  |  | Ref |  |  |
| SES |  |  |  |  |  |  |  |  |
|  | High / Middle | Ref |  |  |  | Ref |  |  |
|  | Low | 1.14 (.91) | 0.05 | 1.24 | .214 | .45 (.76) | 1.56 | .558 |
| Maternal Schooling |  |  |  |  |  |  |  |  |
|  | Left before 16 | 2.05 (.71) | 0.12 | 2.89 | **.004** | 1.01 (.52) | 2.76^ | **.052** |
|  | Left after 16 | Ref |  |  |  | Ref |  |  |
| Paternal Schooling |  |  |  |  |  |  |  |  |
|  | Left before 16 | 1.75 (.60) | 0.12 | 2.90 | **.004** | .88 (.49) | 2.41^ | **.074** |
|  | Left after 16 | Ref |  |  |  | Ref |  |  |
| Informal Support (p1) |  | .03 (.03) | 0.05 | 1.15 | .249 | -.06 (.03) | 0.94 | **.030** |
| Mother’s Age (preg) |  | -0.17 (.04) | -0.17 | -4.37 | **<.001** | -.15 (.04) | 0.86 | **<.001** |
|  |  |  |  |  |  |  |  |  |
| Paternal Presence (p1) |  |  |  |  |  |  |  |  |
|  | Yes | Ref |  |  |  | Ref |  |  |
|  | No | 2.60 (.80) | 0.13 | 2.48 | **.001** | 1.28 (.530) | 3.58 | **.016** |
| Paternal Presence (p2) |  |  |  |  |  |  |  |  |
|  | Yes | Ref |  |  |  | Ref |  |  |
|  | No | 3.16 (.76) | 0.17 | 4.13 | **<.001** | 1.56 (.50) | 4.76 | **.002** |
| Paternal Presence (p3) |  |  |  |  |  |  |  |  |
|  | Yes | Ref |  |  |  | Ref |  |  |
|  | No | 3.23 (.68) | 0.21 | 4.75 | **<.001** | 1.56 (.50) | 4.77 | **.002** |
| Paternal Presence (p4) |  |  |  |  |  |  |  |  |
|  | Yes | Ref |  |  |  | Ref |  |  |
|  | No | 2.12 (.54) | 0.17 | 4.07 | **<.001** | .78 (.45) | 2.19^ | **.081** |
| Paternal Presence (p5) |  |  |  |  |  |  |  |  |
|  | Yes | Ref |  |  |  | Ref |  |  |
|  | No | 2.28 (.47) | 0.20 | 4.89 | **<.001** | .83 (.41) | 2.29 | **.043** |
| *Note.* P values for control variables meeting threshold of inclusion (p<.10) are bolded | | | | | | | | |
